# Supplementary material for: NAP-2 Secreted by Human NK Cells Can Stimulate Mesenchymal Stem/Stromal Cell Recruitment
Source: PubMed Central journal article supplement — Stem Cell Reports. 2016 Mar 24;6(4):466–73. doi: 10.1016/j.stemcr.2016.02.012 (PMC4834048; doi:10.1016/j.stemcr.2016.02.012), 2016-03-24
Supplement: mmc1.pdf [file mmc1.pdf]

**Stem Cell Reports, Volume 6**

**Supplemental Information**

**NAP-2 Secreted by Human NK Cells Can Stimulate Mesenchymal  
Stem/Stromal Cell Recruitment**

**Catarina R. Almeida, Hugo R. Caires, Daniela P. Vasconcelos, and Mário A. Barbosa**

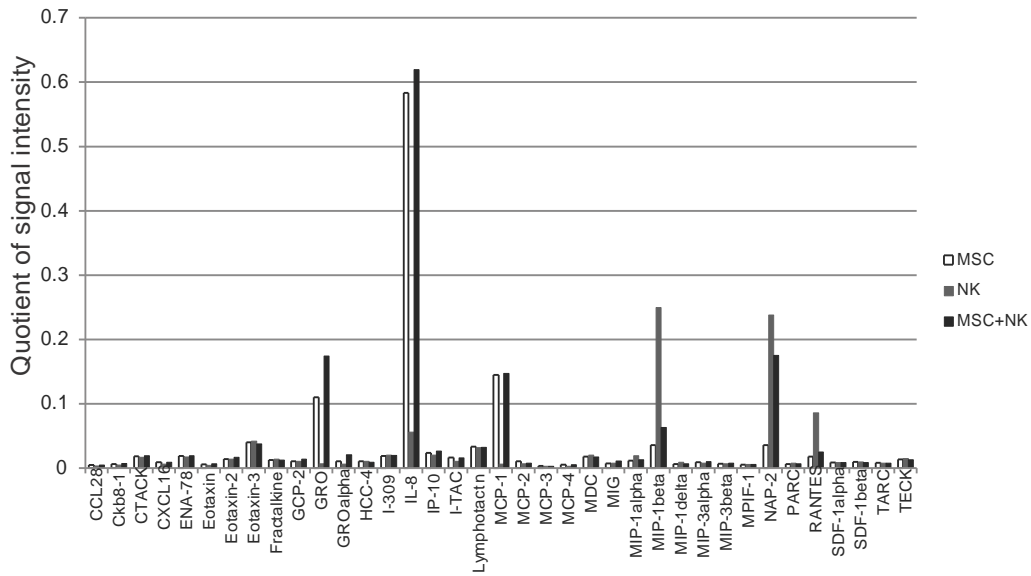

Figure S1, Related to Figure 1C: Analysis of culture supernatants with protein arrays. Membrane protein arrays detecting 38 different factors were used to analyse the factors present in supernatants from NK cells, MSC or co-culture of NK cells and MSC. The average intensity of signal detected for each factor was divided by the average intensity of signal detected for the positive controls (n=2). Graph shows data obtained with one NK cell donor representative of three.

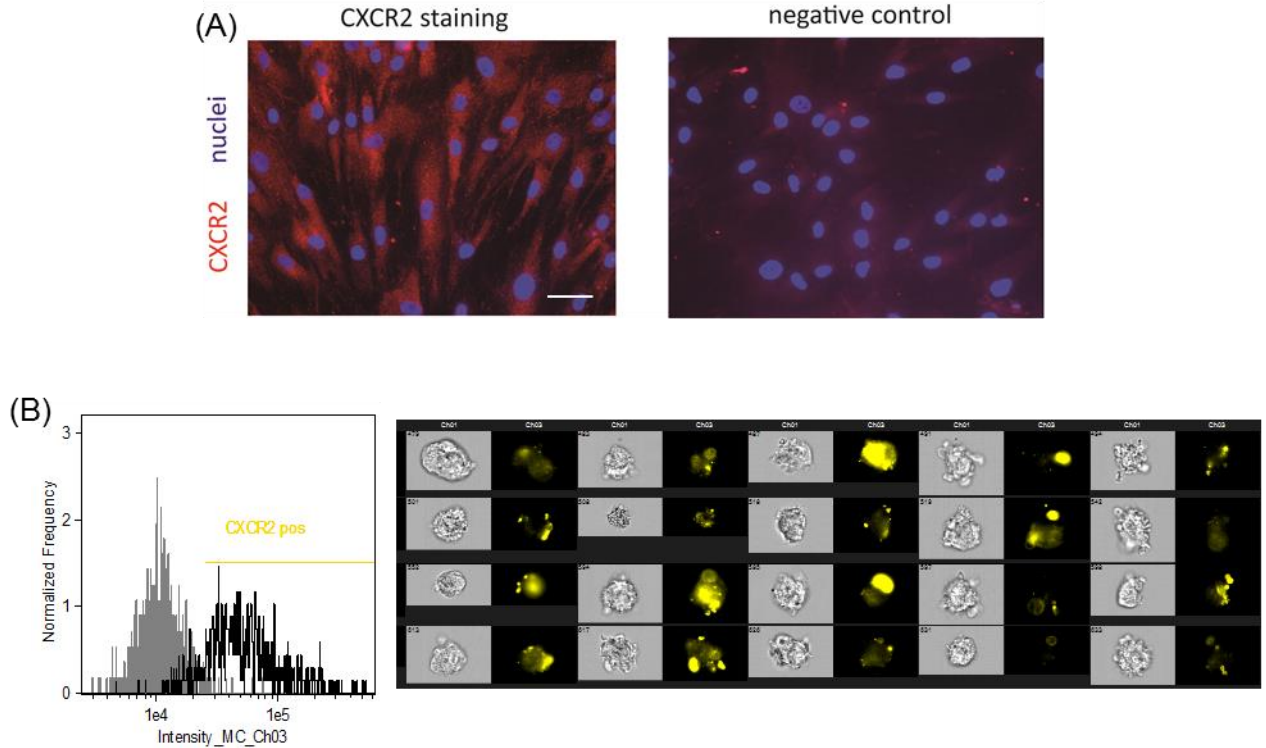

Figure S2, Related to Figure 3A: Human bone marrow MSC express CXCR2. (A) MSC were stained with an anti-human CXCR2 antibody (clone # 48311, R&D) followed by a RPE-labeled anti-mouse IgG secondary antibody (Invitrogen) and imaged by fluorescence microscopy. Negative control refers to cells stained only with the secondary antibody. Scale bar, 100  $\mu$ m. (B) MSC were harvested with 5mM EDTA, fixed, permeabilized and stained with an antibody against human CXCR2 before imaging flow cytometry analysis with ImageStream<sup>X</sup> (Amnis, Merck Millipore). Left, histogram showing the intensity of fluorescence detected in focused and single cells. Black histogram represents the stained cells while the grey filled histogram shows the negative control, without primary antibody. The percentage of CXCR2+ cells (yellow gate) was 87.2 in this example. Right, panel with examples of cells analysed. Expression of CXCR2 was found in MSC isolated from three out of three donors analysed.
